# Supplementary material
Source: PubMed Central journal article supplement (PMC7096331)

Figure S1

Fiber photometry recording from Pvl neurons

No difference in activation of Pvl neurons from primed and unprimed females

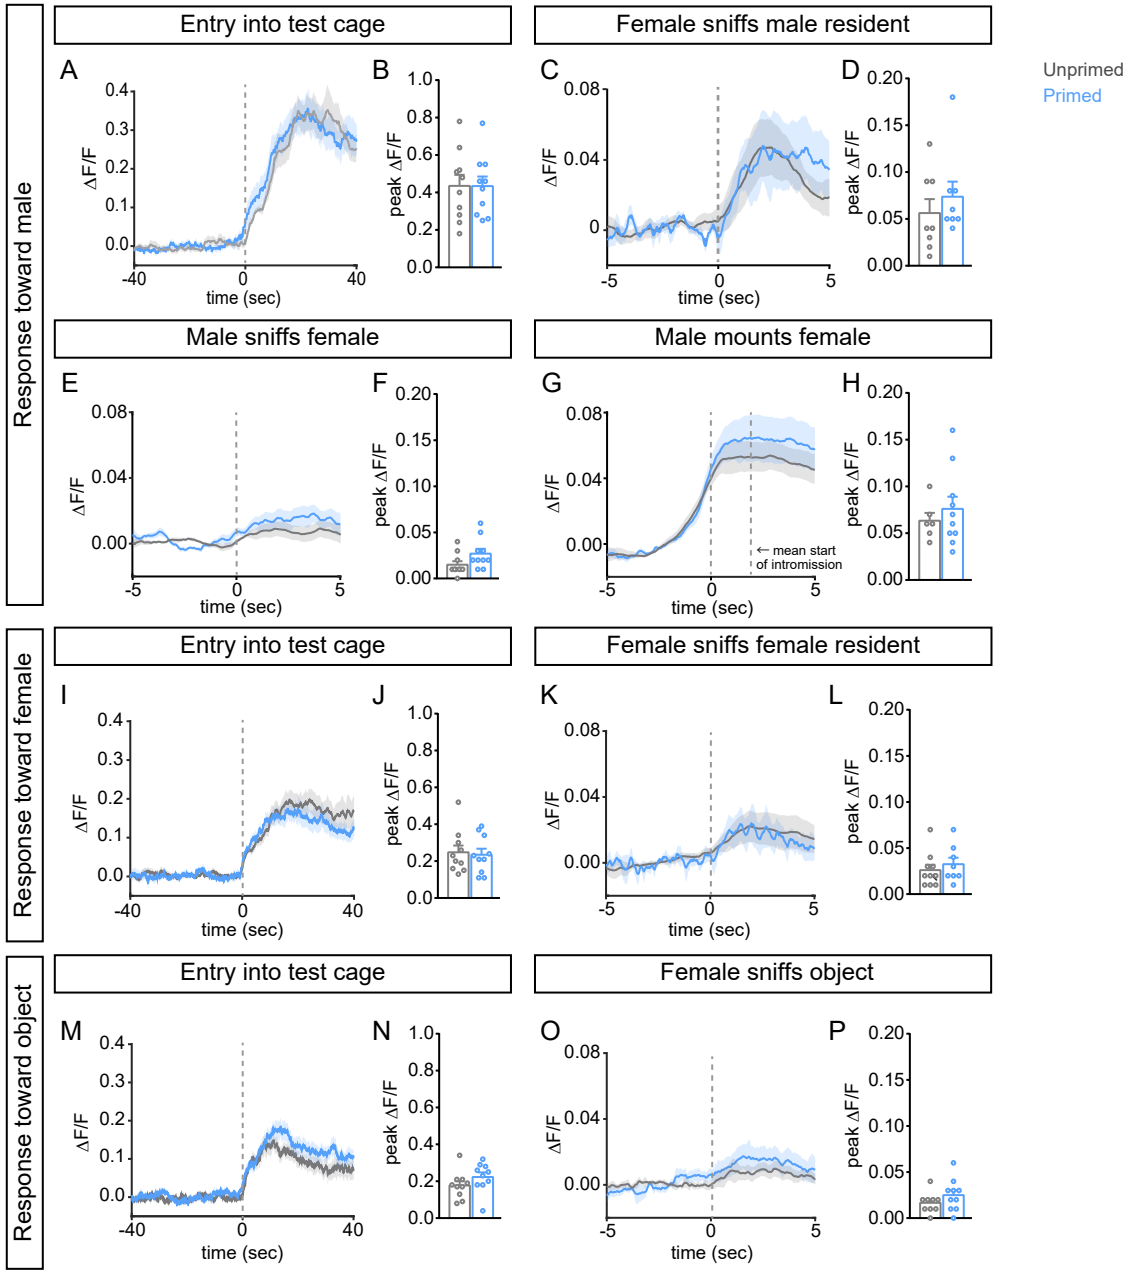

Serum ACTH levels

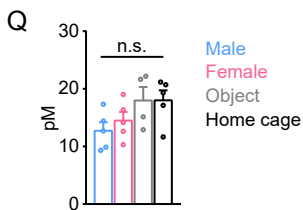

Supplement: NIHMS1542040-supplement-Figure_S1.pdf [file NIHMS1542040-supplement-Figure_S1.pdf]
