# Supplementary material
Source: PubMed Central journal article supplement (PMC7096331)

Figure S5

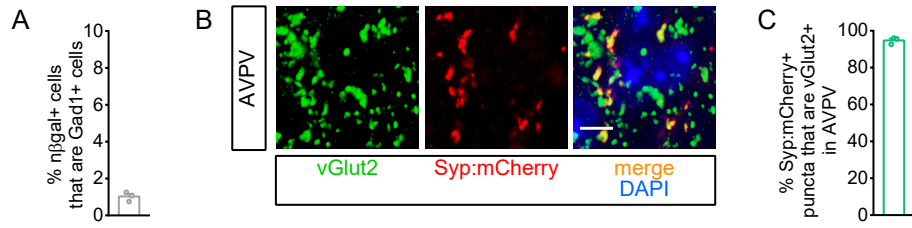

Activation of Pvl neurons induces Fos in VMHvl in primed females

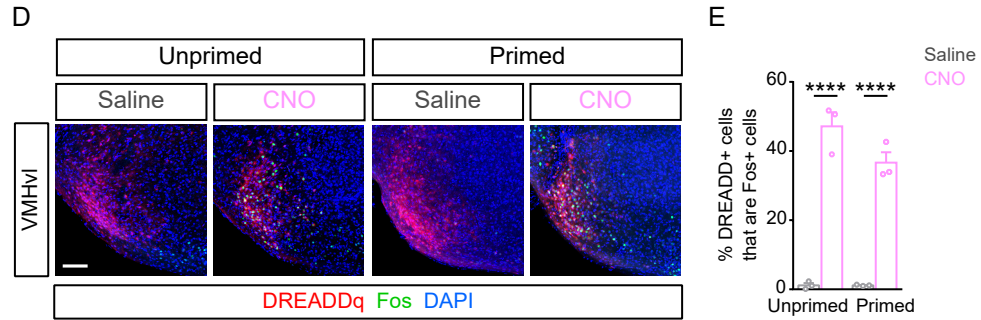

Synaptic inputs from Pvl neurons to AVPV neurons

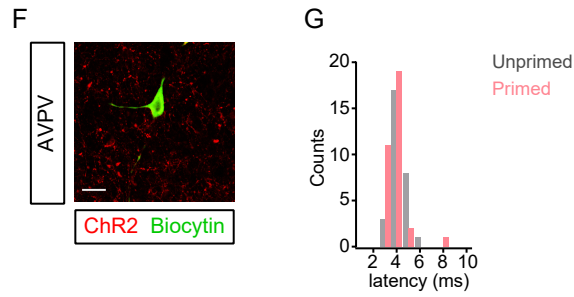

Supplement: NIHMS1542040-supplement-Figure_S5.pdf [file NIHMS1542040-supplement-Figure_S5.pdf]
