# Supplementary material
Source: PubMed Central journal article supplement (PMC7096331)

Figure S7

Estrogen signaling in Pvl neurons regulates their projection termini to AVPV

Estrogen priming alone does not increase presynaptic termini of Pvl neurons in POA or PAG

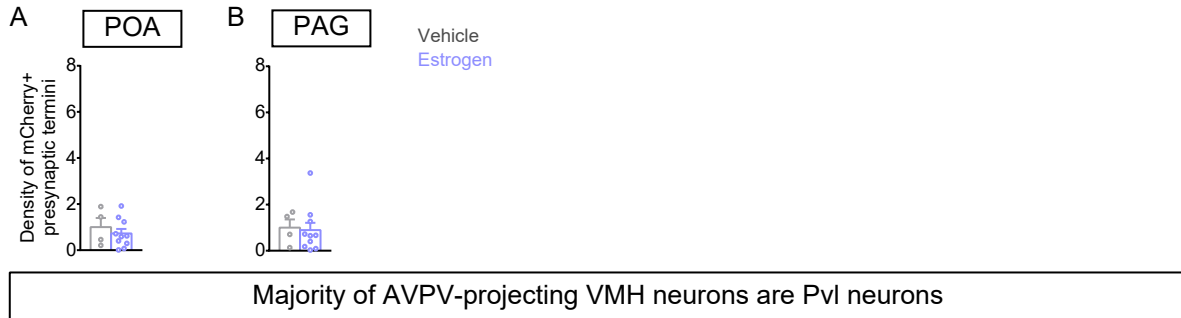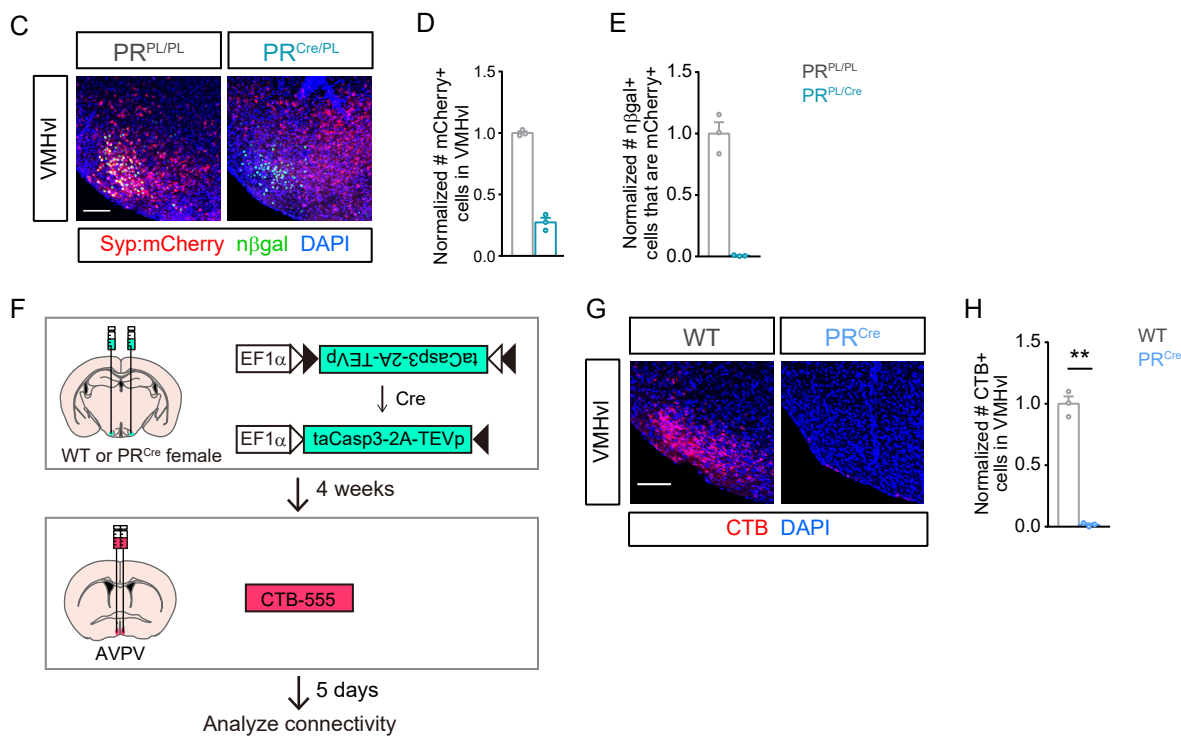

Esr1 is required in Pvl neurons for priming induced increase in presynaptic termini to AVPV

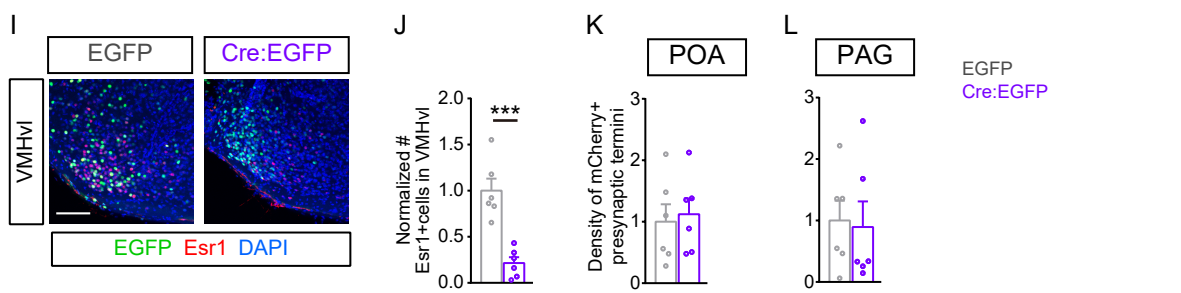

Supplement: NIHMS1542040-supplement-Figure_S7.pdf [file NIHMS1542040-supplement-Figure_S7.pdf]
