# Supplementary material
Source: PubMed Central journal article supplement (PMC7096331)
Supplement: NIHMS1542040-supplement-Table_S1.pdf [file NIHMS1542040-supplement-Table_S1.pdf]

**Table S1, Related to Figures 1-6**

| Hormone           | Primed female | Naturally cycling female in estrus | p value |
|-------------------|---------------|------------------------------------|---------|
| Estrogen (nM)     | 0.22 ± 0.07   | 0.12 ± 0.01                        | 0.27    |
| Progesterone (nM) | 12.78 ± 4.37  | 11.81 ± 1.45                       | 0.74    |
