# Supplementary material
Source: PubMed Central journal article supplement (PMC7096331)

Figure S2

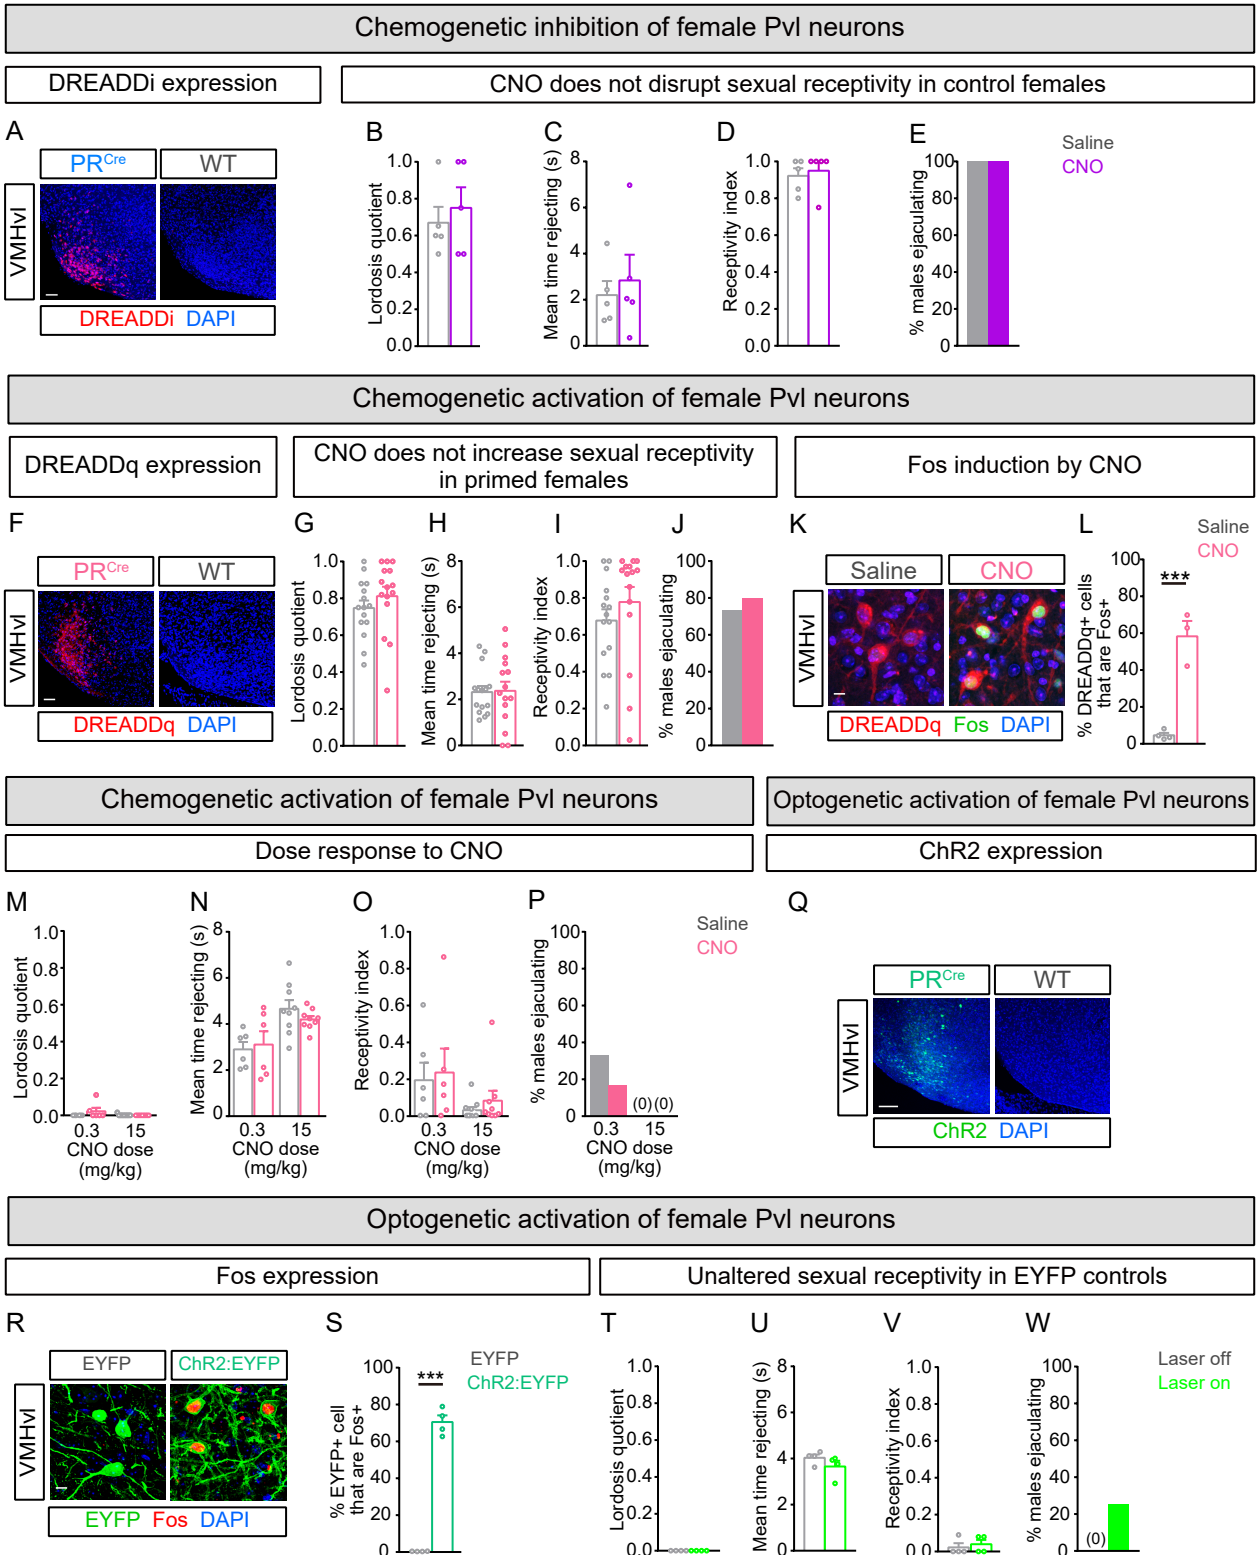

Supplement: NIHMS1542040-supplement-Figure_S2.pdf [file NIHMS1542040-supplement-Figure_S2.pdf]

Figure S3

Structural plasticity of projection termini of Pvl neurons in AVPV

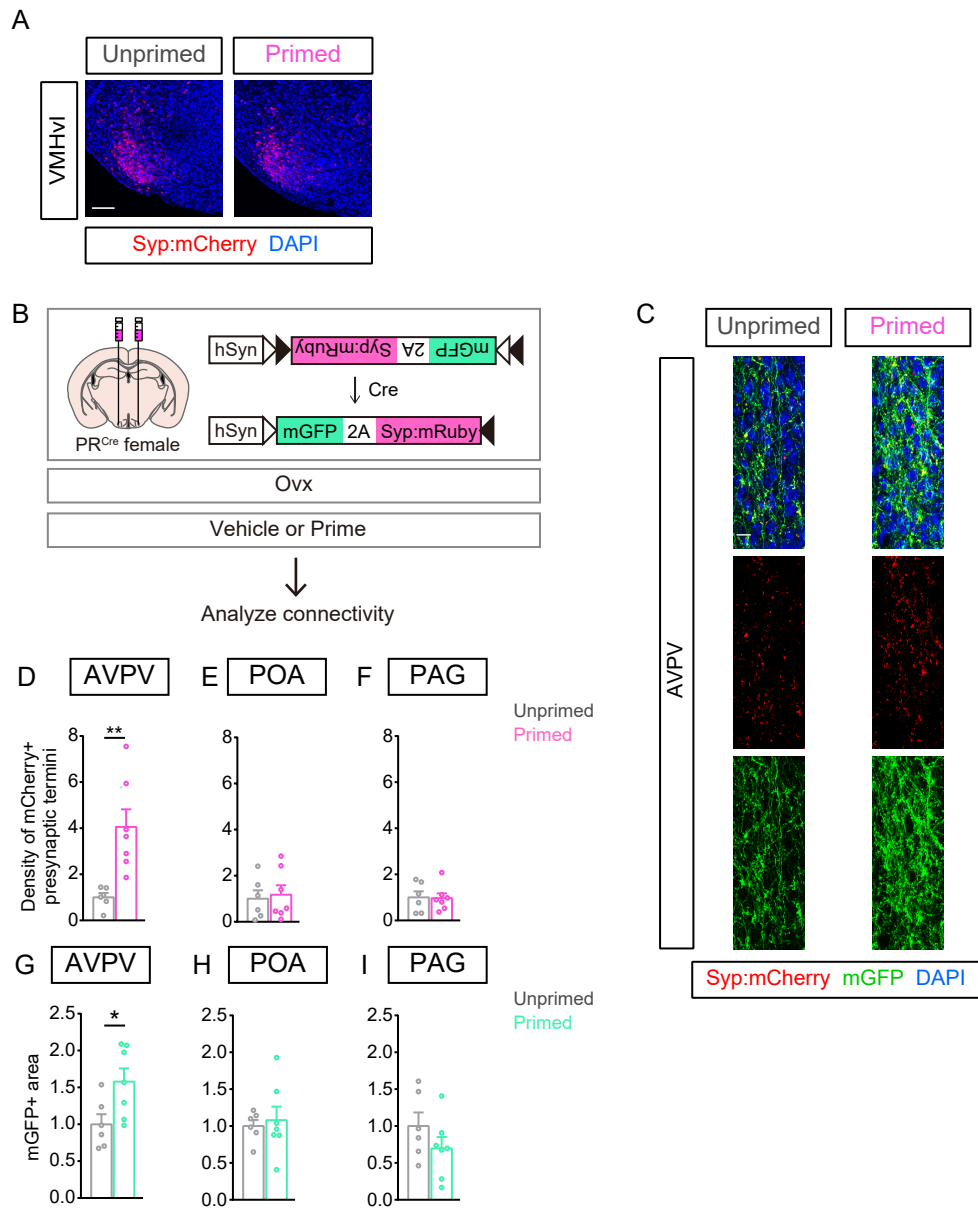

Supplement: NIHMS1542040-supplement-Figure_S3.pdf [file NIHMS1542040-supplement-Figure_S3.pdf]

Figure S4

Serum sex hormone levels

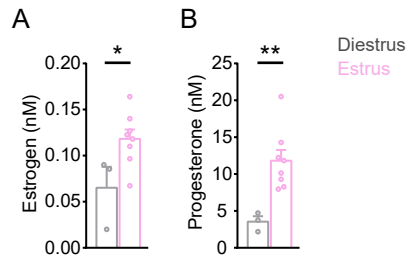

Supplement: NIHMS1542040-supplement-Figure_S4.pdf [file NIHMS1542040-supplement-Figure_S4.pdf]

Figure S6

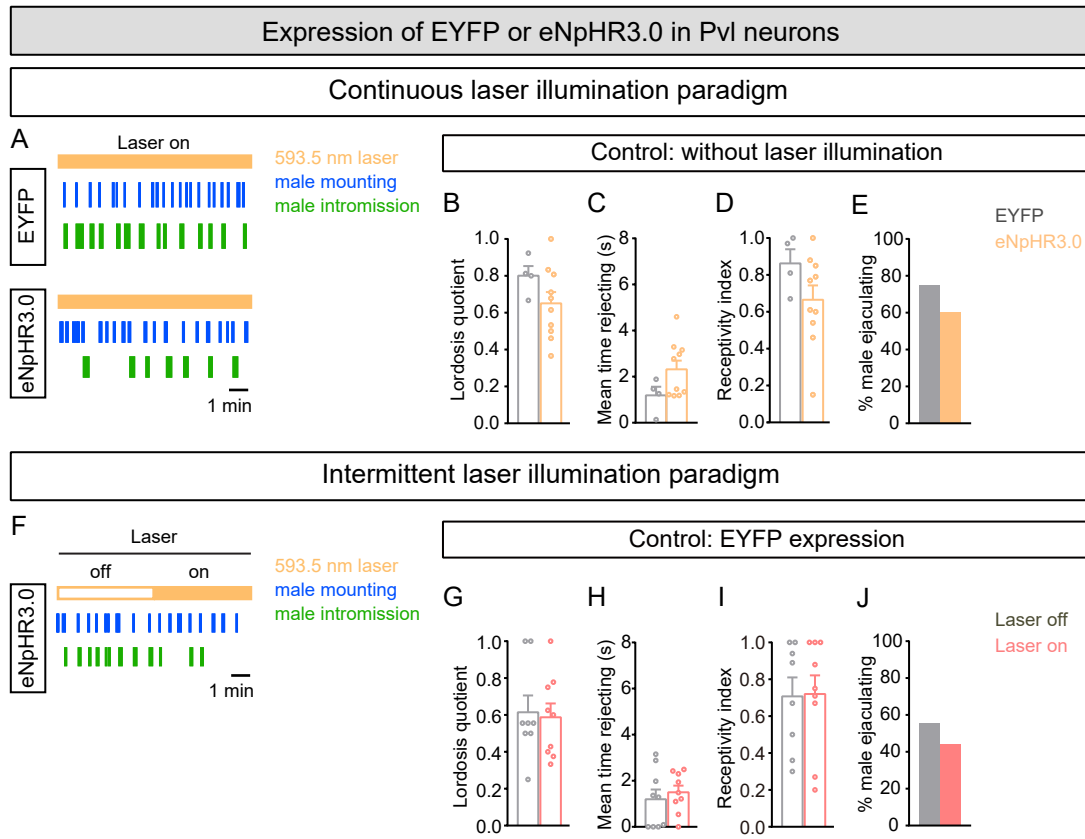

Supplement: NIHMS1542040-supplement-Figure_S6.pdf [file NIHMS1542040-supplement-Figure_S6.pdf]
